# Supplementary material
Source: HighWire-hosted journal article supplement (https://bibliotheek.ehb.be/content/suppl/2024/03/14/bmjnph-2022-000605)
Supplement: bmjnph-2022-000605supp001_data_supplement.pdf [file bmjnph-2022-000605supp001_data_supplement.pdf]

**Supplementary table: Constipation related signs and symptoms among postpartum women in study and control groups in post assessment**

**N=66**

| Signs and symptoms of constipation      | None n (%)  |               | Mild n (%)  |               | Moderate n (%) |               | Severe n (%) |               | Very severe n (%) |               |
|-----------------------------------------|-------------|---------------|-------------|---------------|----------------|---------------|--------------|---------------|-------------------|---------------|
|                                         | Study group | Control group | Study group | Control group | Study group    | Control group | Study group  | Control group | Study group       | Control group |
| Abdominal distension or bloating        | 66 (100)    | 74 (100)      | 0 (0)       | 0 (0)         | 0 (0)          | 0 (0)         | 0 (0)        | 0 (0)         | 0 (0)             | 0 (0)         |
| Change in amount of gas passed rectally | 65 (98.5)   | 64 (86.5)     | 1 (1.5)     | 10 (13.5)     | 0 (0)          | 0 (0)         | 0 (0)        | 0 (0)         | 0 (0)             | 0 (0)         |
| Less frequent bowel movements           | 62 (93.9)   | 54 (73)       | 0 (0)       | 0 (0)         | 4 (6.1)        | 19 (25.7)     | 0 (0)        | 1 (1.3)       | 0 (0)             | 0 (0)         |
| Oozing liquid stool                     | 66 (100)    | 74 (100)      | 0 (0)       | 0 (0)         | 0 (0)          | 0 (0)         | 0 (0)        | 0 (0)         | 0 (0)             | 0 (0)         |
| Rectal fullness or pressure             | 62 (94)     | 54 (73)       | 3 (4.5)     | 8 (10.8)      | 1 (1.5)        | 12 (16.2)     | 0 (0)        | 0 (0)         | 0 (0)             | 0 (0)         |
| Rectal pain with bowel movement         | 62 (93.9)   | 54 (73)       | 0 (0)       | 0 (0)         | 0 (0)          | 1 (1.3)       | 4 (6.1)      | 19 (25.7)     | 0 (0)             | 0 (0)         |
| Small volume of stool                   | 62 (94)     | 54 (73)       | 3 (4.5)     | 12 (16.2)     | 1 (1.5)        | 8 (10.8)      | 0 (0)        | 0 (0)         | 0 (0)             | 0 (0)         |
| Unable to pass stool                    | 62 (93.9)   | 54 (73)       | 0 (0)       | 0 (0)         | 4 (6.1)        | 17 (23)       | 0 (0)        | 3 (4)         | 0 (0)             | 0 (0)         |
